# Supplementary material for: Plasma fibrin membranes loaded with bone marrow mesenchymal stem cells and corneal epithelial cells promote corneal injury healing via attenuating inflammation and fibrosis after corneal burns
Source: Royal Society of Chemistry journal article supplement (doi:10.1039/d3bm00713h), 2023-01-01
Supplement: d3bm00713h1.pdf [file d3bm00713h1.pdf]

## Supplementary Material

### **Plasma fibrin membranes loaded with bone marrow mesenchymal stem cells and corneal epithelial cells promote corneal injury healing via attenuating inflammation and fibrosis after corneal burns**

Liqun Song<sup>a†</sup>, Xue Yang<sup>a†</sup> and Huifei Cui<sup>\*abc</sup>

<sup>a</sup> Key Laboratory of Chemical Biology, Ministry of Education, Institute of Biochemical and Biotechnological Drugs, School of Pharmaceutical Sciences, Cheeloo college of Medicine, Shandong University, Jinan, 250012, Shandong, China

<sup>b</sup> National Glycoengineering Research Center, Cheeloo College of Medicine, Shandong University, Jinan, 250012, Shandong, China

<sup>c</sup> Shandong Provincial Key Laboratory of Carbohydrate Chemistry and Glycobiology, Cheeloo College of Medicine, Shandong University, Jinan, 250012, Shandong, China

† First author: Liqun Song and Xue Yang have contributed equally to the work.

\*Corresponding author: Huifei Cui

School of Pharmaceutical Sciences, Cheeloo College of Medicine, Shandong University, 44 West Wenhua Road, Jinan, 250012, Shandong, China. Tel: 0531-88380288, E-mail address: [cuihuifei@sdu.edu.cn](mailto:cuihuifei@sdu.edu.cn)

| Gene           | Forward sequence (5'-3')    | Reverse sequence (5'-3')     |
|----------------|-----------------------------|------------------------------|
| $\beta$ -actin | CACGATGGAGGGGCCGACTCAT<br>C | TAAAGACCTCTATGCCAACACAG<br>T |
| p63            | GCCGTGAGACTTATGAAATGC       | CTGAAGTAGGTGTTGGTGCTG        |
| CK12           | GAAACCGAGGGTGGATACTGC       | TGGAGACCGTGAGGGATAAG         |

Table S1: Primer sequences of the genes for qRT-PCR analysis.

| Sample                   | $\Delta$ Ct(p63- $\beta$ -actin) | $\Delta$ Ct(CK12- $\beta$ -actin) |
|--------------------------|----------------------------------|-----------------------------------|
| BMSCs                    | NE                               | NE                                |
| Corneal epithelial cells | 9.77                             | 11.33                             |
| A                        | 10.70                            | 12.10                             |
| B                        | 12.30                            | 13.27                             |
| C                        | 13.30                            | 13.49                             |

Table S2:  $\Delta$ Ct values of p63 and CK12 genes for each group of samples

Note: NE=No Express.
